# Supplementary material
Source: PubMed Central journal article supplement (PMC6724531)
Supplement: NIHMS1032725-supplement-Supp.pdf [file NIHMS1032725-supplement-Supp.pdf]

## Supplemental Figure 1

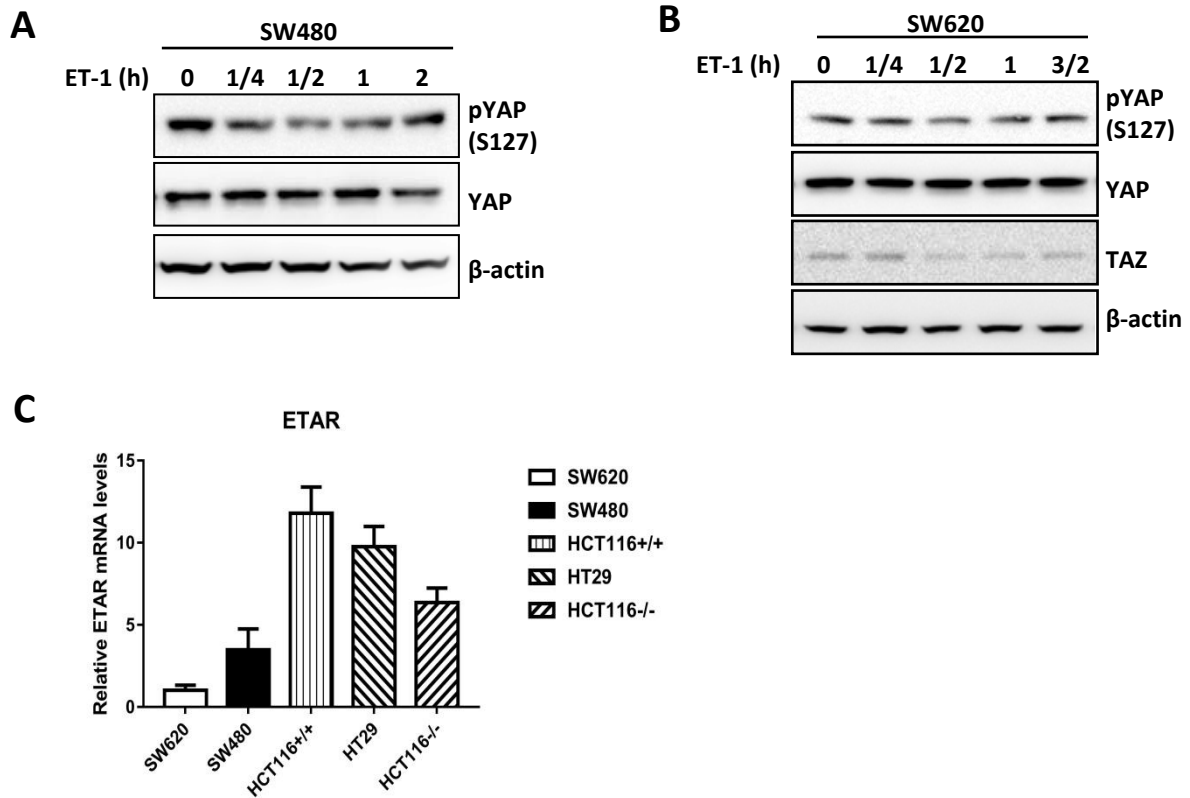

**Figure S1. Stimulation of ETAR activates YAP/TAZ**

(A) ETAR activation dephosphorylates YAP in SW480. SW480 cells were serum-starved for 14 h and treated with 150 nM of ET-1 for the duration indicated.

(B) ET-1 is unable to induce YAP/TAZ dephosphorylation in SW620 cells. SW620 cells were serum-starved for 14 h and treated with 100 nM of ET-1 for the indicated times.

(C) The response of YAP/TAZ to ET-1 is correlated to ETAR expression. mRNA expression level of ETAR in SW620, SW480, HCT116 p53<sup>+/+</sup>, HT29 and HCT116 p53<sup>-/-</sup> cells were measured by Real-Time PCR.

## Supplemental Figure 2

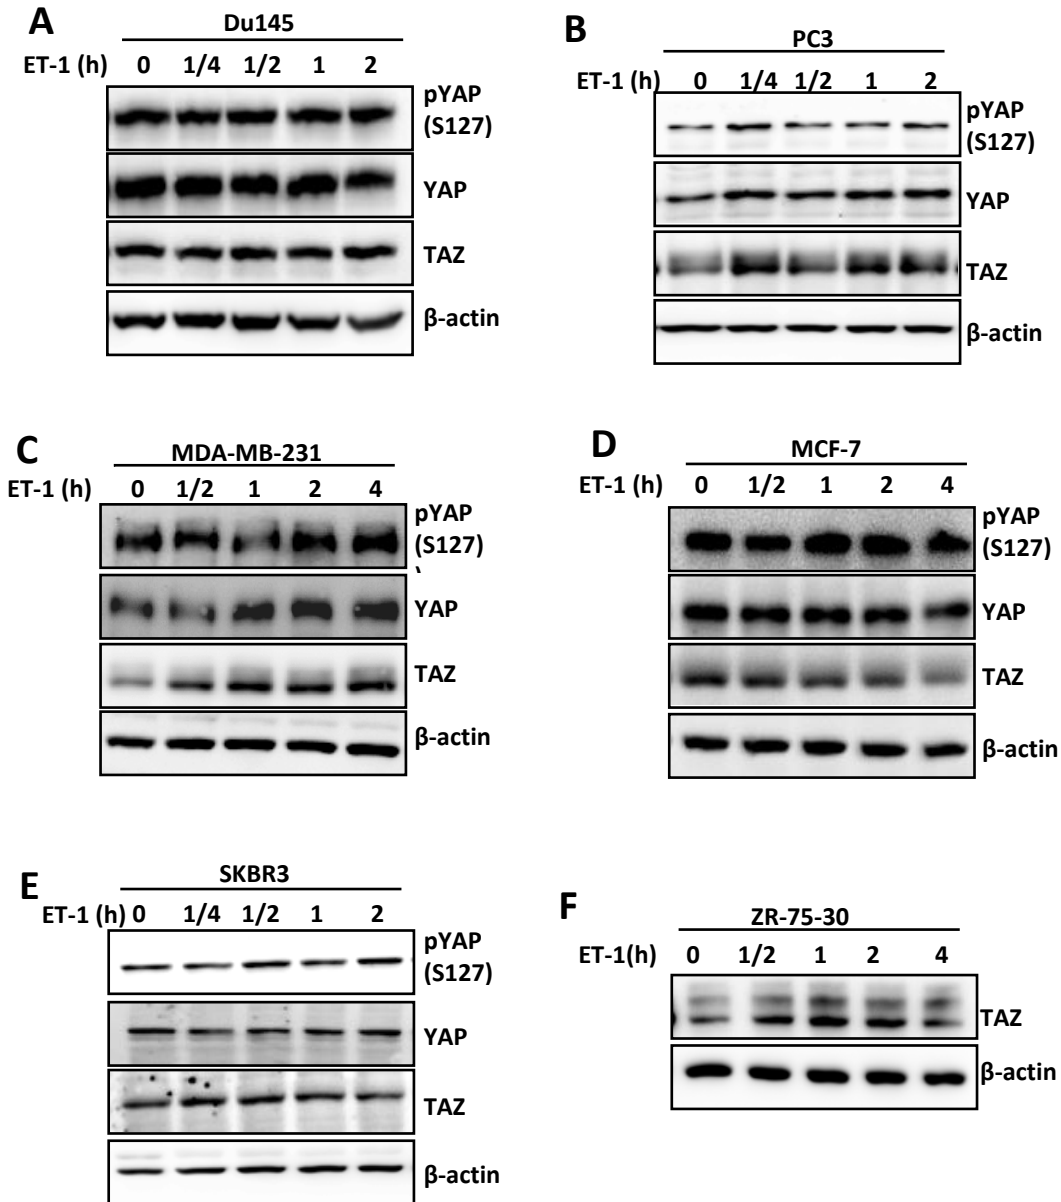

**Figure S2. Effect of ET-1 on YAP/TAZ in prostate cancer cells and breast cancer cells**

(A) ET-1 treatment in Du145 cells. Du145 cells were serum-starved for 14 h and treated with 100 nM of ET-1 for the duration indicated. (B) ET-1 treatment in PC3 cells. PC3 cells were serum-starved for 14 h and treated with 100 nM of ET-1 for the duration indicated. (C-F) Treatment of ET-1 in breast cancer cell lines. MDA-MB-231 (C), MCF7 (D), SKBR3 (E) and ZR-75-30 (F) cells were serum-starved for 14 h and treated with 100 nM of ET-1 for the duration indicated. ZR-75-30 cells show low expression of YAP protein.

### Supplemental Figure 3

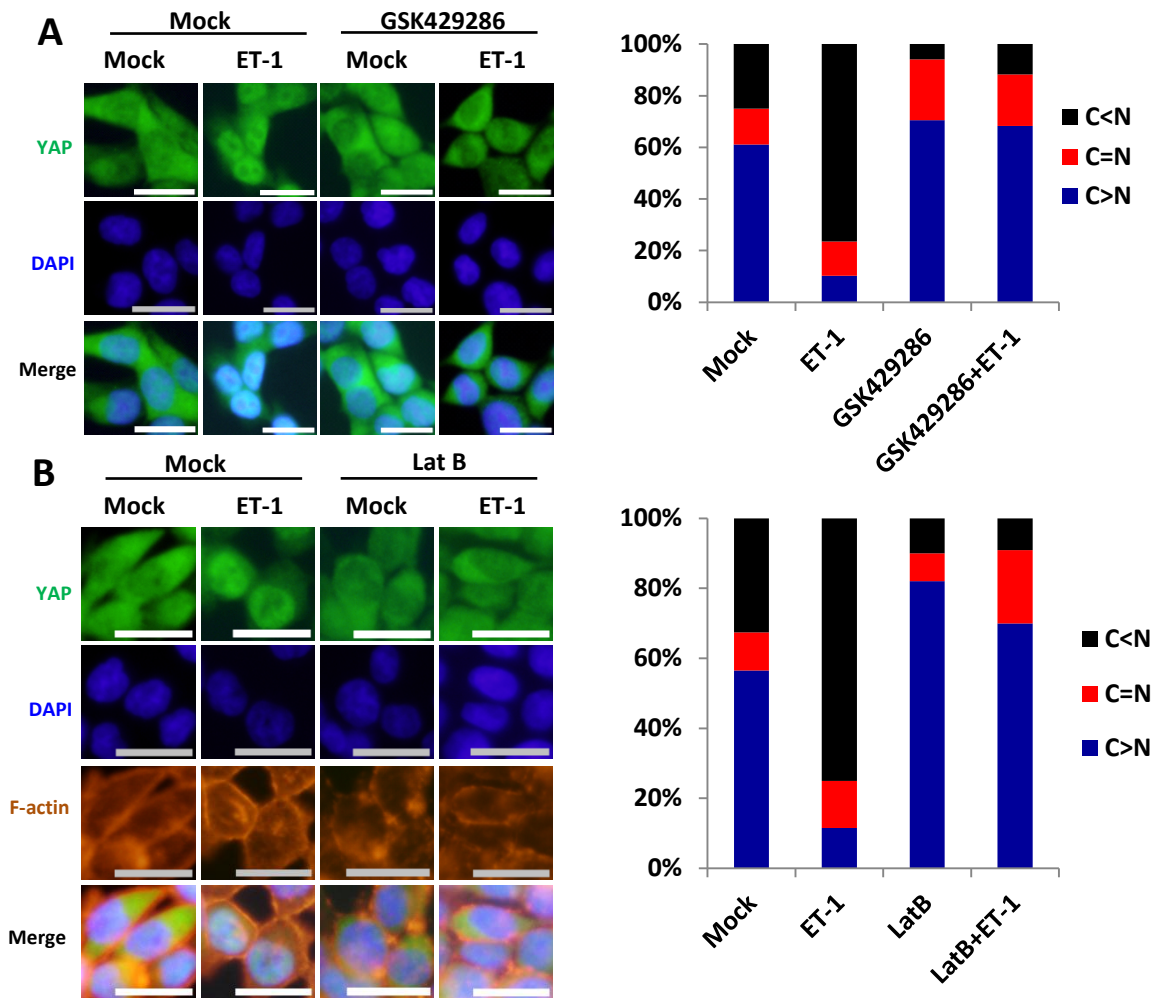

## Supplemental Figure 4

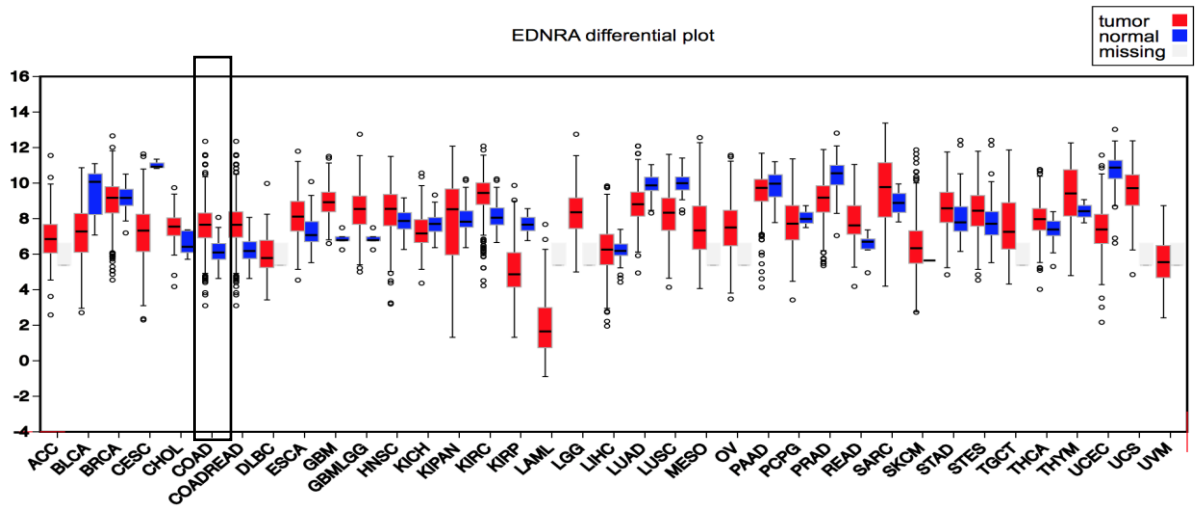

**Figure S4. Expression levels of ETAR in tumors**

(A) ETAR mRNA expression levels in various cancers. The differential plot of mRNA levels was drawn with FIREBROWSE shows in log<sub>2</sub> RSEM. Expression of ETAR in colon cancers is boxed.
